# Supplementary material
Source: Springer Nature journal article supplement (https://www.springermedizin.de/resource/supplementary/12883_2013_937_MOESM1_ESM.pdf/9456486)

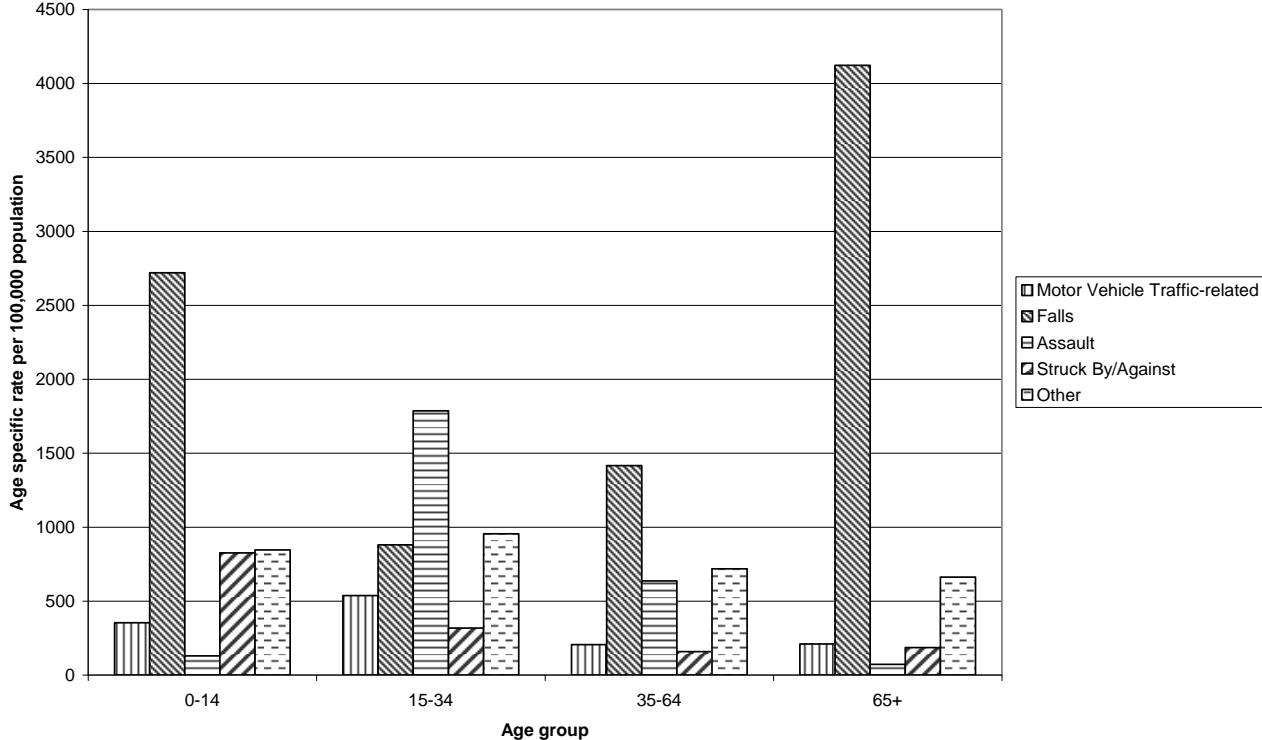

| Age group | Motor Vehicle Traffic-related | Falls   | Assault | Struck By/Against | Other  |
|-----------|-------------------------------|---------|---------|-------------------|--------|
| 0-14      | 353.43                        | 2719.31 | 129.77  | 825.69            | 845.18 |
| 15-34     | 537.5                         | 880.67  | 1786.05 | 316.85            | 955.41 |
| 35-64     | 205.38                        | 1415.32 | 635.81  | 157.26            | 717.68 |
| 65+       | 209.14                        | 4121.66 | 72.28   | 184.85            | 661.85 |

Supplement: MOESM1 [file 9456486]
